# Supplementary material
Source: publisher figshare collection journal article supplement (https://asha.figshare.com/articles/dataset/_/24388666)
Supplement: Supplementary file 1 [file 1]

**Supplemental Material S1.** Outcomes measures were visualized as a function of speaker group and sex or speaker age.

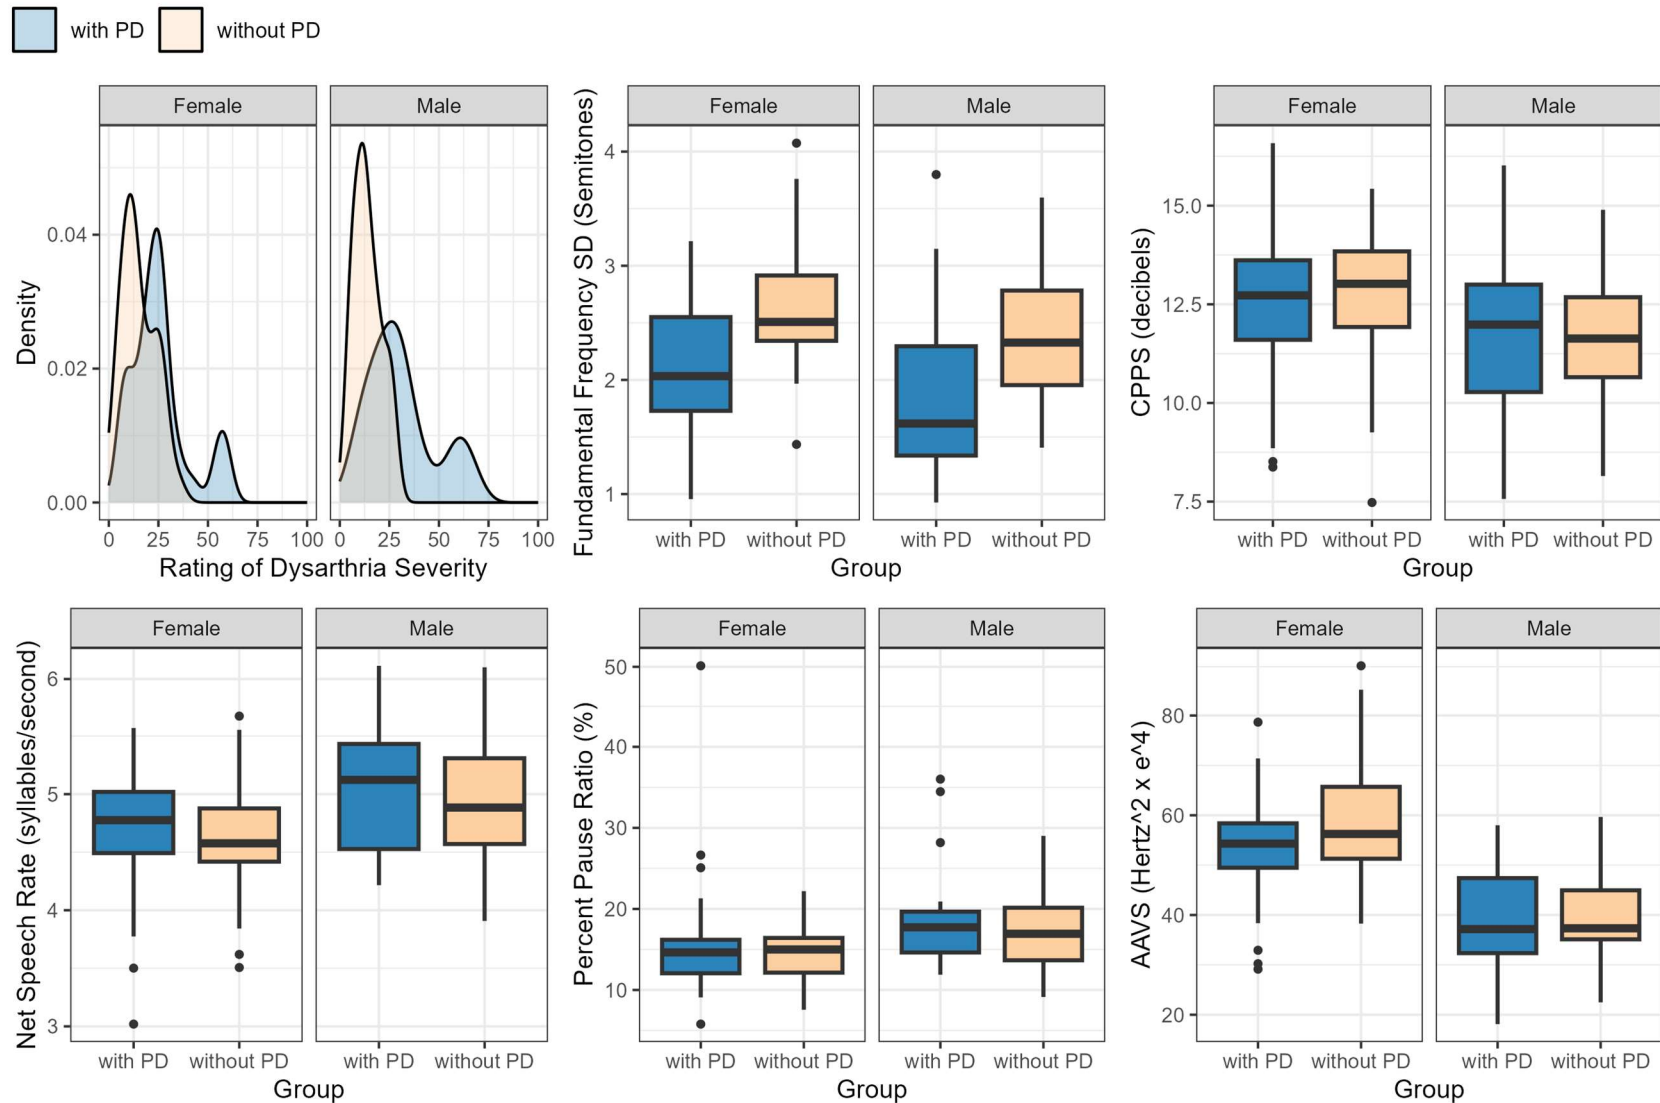

**Figure S1.** Outcome measures were plotted as a function of speaker group and speaker sex. A density plot depicts the distribution of ratings of dysarthria severity. The measures fundamental frequency ( $f_0$ ) standard deviation (SD), smoothed cepstral peak prominence (CPPS), net speech rate, percent pause ratio, and articulatory-acoustic vowel space (AAVS) are depicted using boxplots. Blue represents participants with Parkinson's disease (PD) and orange represents persons without PD.

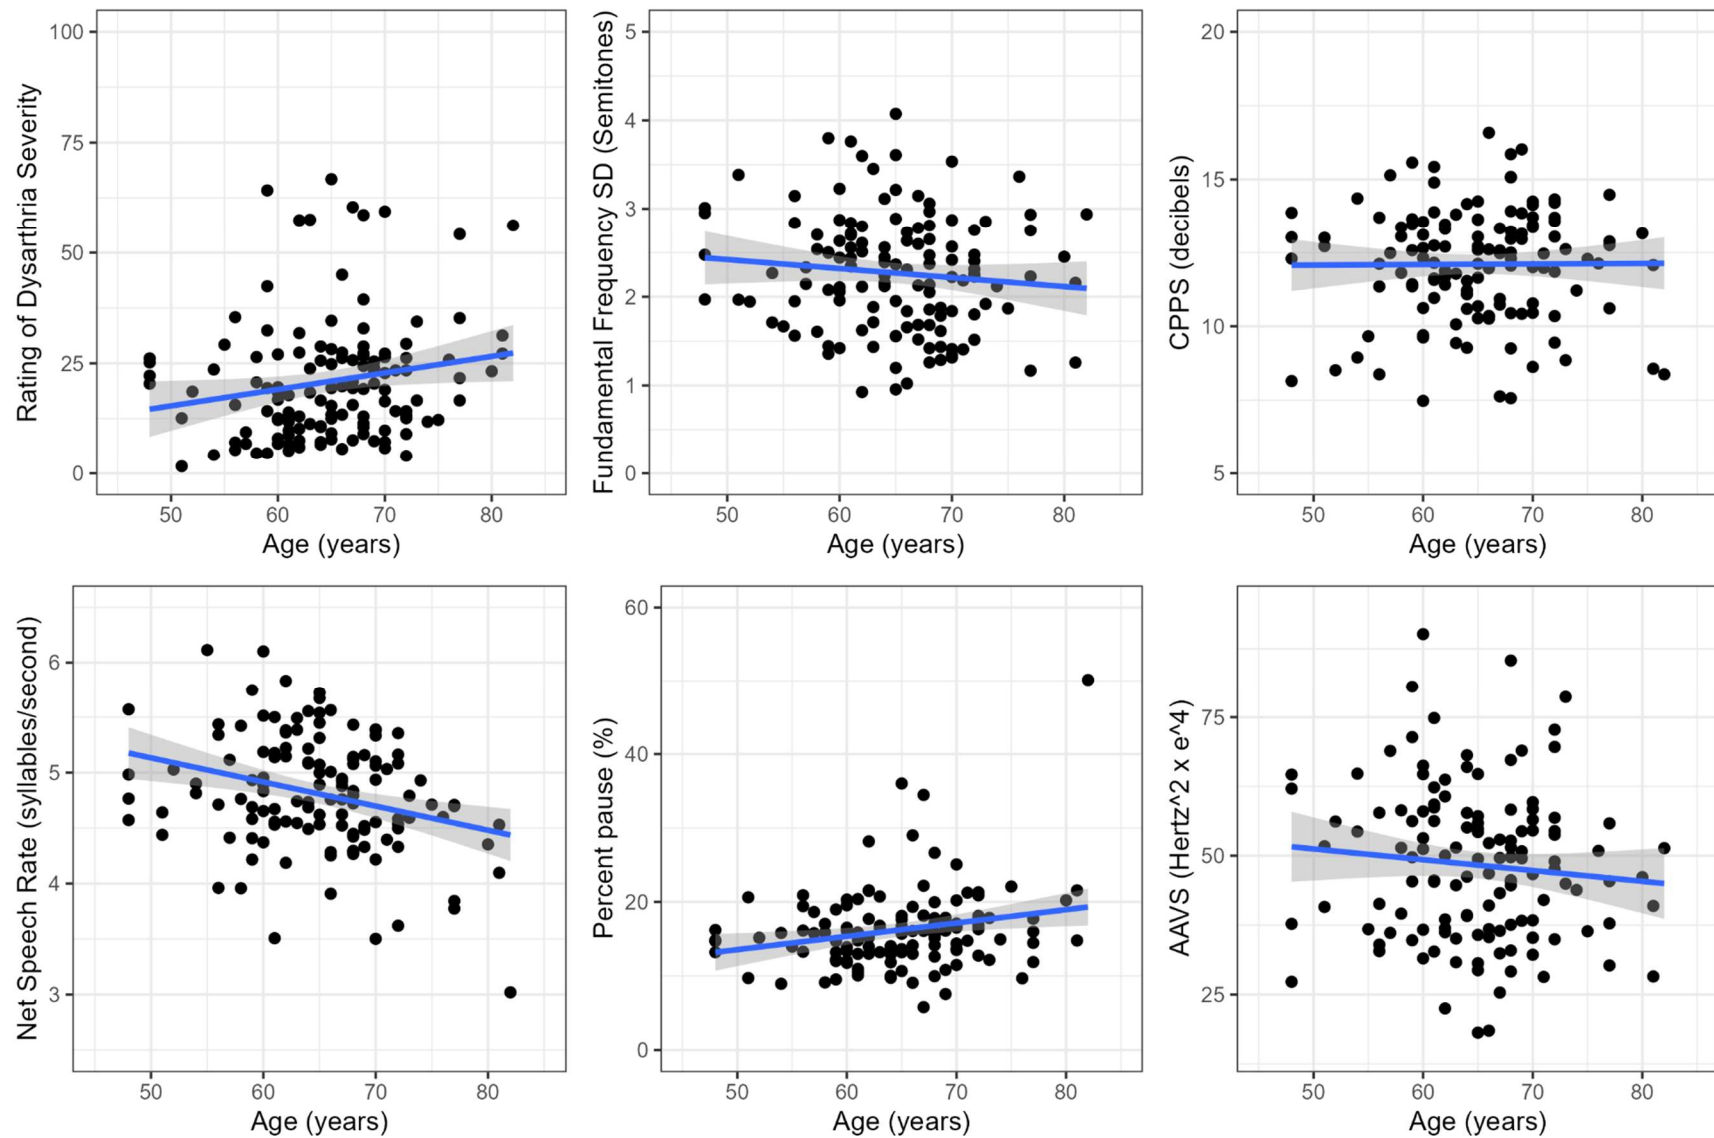

**Figure 2.** Outcome measures were plotted as a function of age. The dark gray region around the line represents the 95% confidence interval.
