# Supplementary material
Source: publisher figshare collection journal article supplement (https://asha.figshare.com/articles/dataset/_/24388666)
Supplement: Supplementary file 2 [file 1]

**Supplemental Material S2.** Descriptive data for by sex for demographic and acoustic variables for persons with PD who received clinical ratings of dysarthria greater than 15.40.

|                                        | With PD                              |                                      |
|----------------------------------------|--------------------------------------|--------------------------------------|
|                                        | Female ( <i>n</i> = 7)               | Male ( <i>n</i> = 12)                |
| Age (year)                             | 71 (8)<br>range = 59–82              | 65 (6)<br>range = 56–81              |
| UPDRS Part III                         | 58.21 (17.15)<br>range = 40.5–85     | 51.42 (14.64)<br>range = 20–77       |
| Time since diagnosis (year)            | 12.29 (4.42)<br>range = 6.00–18.00   | 6.75 (3.33)<br>range = 3.00–12.00    |
| Clinical ratings of dysarthria         | 48.54 (11.12)<br>range = 34.40–59.40 | 46.20 (14.03)<br>range = 31.27–66.73 |
| <i>f</i> <sub>0</sub> SD (semitones)   | 2.02 (0.77)<br>range = 0.96–2.94     | 1.72 (0.82)<br>range = 0.93–3.80     |
| CPPS (decibels)                        | 12.17 (2.62)<br>range = 8.37–15.57   | 10.81 (2.09)<br>range = 7.57–13.65   |
| Net speech rate (syllables/second)     | 4.17 (0.78)<br>range = 3.02–5.31     | 5.14 (0.58)<br>range = 4.22–5.83     |
| Percent pause ratio (%)                | 21.96 (13.86)<br>range = 12.02–50.12 | 21.07 (7.72)<br>range = 13.00–36.01  |
| AAVS (Hz <sup>2</sup> e <sup>4</sup> ) | 4.66 (1.62)<br>range = 3.02–7.87     | 3.58 (1.08)<br>range = 1.81–5.27     |

*Note.* UPDRS = Unified Parkinson's Disorder Rating Scale; *f*<sub>0</sub> SD = fundamental frequency standard deviation; CPPS = smoothed cepstral peak prominence; AAVS = articulatory-acoustic vowel space; Hz<sup>2</sup> = Hertz squared.
